# Supplementary material for: On the trail of Scandinavia’s early metallurgy: Provenance, transfer and mixing
Source: PLoS One. 2019 Jul 24;14(7):e0219574. doi: 10.1371/journal.pone.0219574 (PMC6655661; doi:10.1371/journal.pone.0219574)
Supplement: S2 Table — (XLSX) [file pone.0219574.s002.xlsx]

## Sheet: PLOS ONE
sample number		object/ artifact	Location	Region/Denmark	analysis 1970`s	museum nb.	CEZA		208Pb/206Pb	207Pb/206Pb	206Pb/204Pb	207Pb/204Pb	208Pb/204Pb		date	type (Vandkilde 1996)	Cluster	Cu %		Fe %		Co %		Ni %		As %		Ag %		Sn %		Sb %		Pb %		Bi %
MA-166610		flanged axe, Anglo-Irish type	Ulstrup	Viborg	SAM-2734	FHM 140A	L 11326		2.0859	0.84915	18.423	15.6439	38.4285		LN II	A -A10	1	88.566	<	0.05	<	0.01	<	0.01	<	0.01		0.00764766		11.4171	<	0.005		0.0042	<	0.005
MA-166611		flanged axe, type Vaerslev	Albaek	Randers	SAM-2737	FHM 6095	L 11327		2.092	0.85106	18.4	15.6595	38.4928		LN II	A -A4	10	97.0707	<	0.05	<	0.01		0.258		0.819		0.87399		0.0466455		0.882992		0.0189		0.02975
MA-166612		flanged axe, type Vaerslev	Egaa	Randers	SAM-2738	FHM 5554	L 11328		2.0835	0.84765	18.476	15.6612	38.4947		LN II	A -A4	10	95.0422	<	0.05	<	0.01		0.314		0.533		0.653179		2.89789		0.54645		0.0056		0.00765
MA-166613		flanged axe, Vaerslev	Egaa	Randers	SAM-2739	FHM 5554	L 11329		2.0896	0.8495	18.439	15.6639	38.5301		LN II	A -A4	10	96.3405	<	0.05		0.014		0.383		0.76		0.795518		0.818624		0.845856		0.0119		0.0306
MA-166614		flanged axe, type Gallemose	Egaa	Randers	SAM-2740	FHM 1179	L 11330		2.0896	0.84984	18.427	15.66	38.5051		LN II	A -A3	10	97.6282	<	0.05	<	0.01		0.024		0.591		0.931048		0.00738927		0.745495		0.0049		0.068
MA-166615		flanged axe, type Hjadstrup	Egaa	Randers	SAM-2741	FHM 1179	L 11331		2.09	0.85119	18.381	15.6457	38.4163		LN II	A -A2	10	95.356	<	0.05		0.01		0.439		0.496		0.669248		2.4924		0.517529		0.0105		0.00935
MA-166616		flanged axe, Aunjetitzer type	Ebeltoft (near)	Randers	SAM-2745	FHM 3010	L 11332		2.0931	0.84832	18.484	15.6803	38.6889		LN II	A -A7	11	94.4279	<	0.05	<	0.01		0.435		0.338		0.508547		3.84255		0.428386		0.0196	<	0.005
MA-166617		flanged axe, type Gallemose	Egtved	Vejle	SAM-2748	FHM 5788	L 11333		2.0901	0.85016	18.415	15.6557	38.4892		LN II	A -A3	10	96.1923	<	0.05	<	0.01		0.053		0.757		0.889611		1.35072		0.704804		0.0203		0.0323
MA-166619		flanged axe, type Store-Heddinge	Stiling	Skanderborg	SAM-2750	FHM 6264	L 11335		2.095	0.85474	18.309	15.6494	38.3574		LN II	A -A5	11	94.0404	<	0.05	<	0.01		0.283		0.197		0.380265		4.71341		0.363289		0.0175		0.0051
MA-166621		flanged axe, type Emmen	Nakkehoved	Frederiksborg	SAM-8161	NM B6655	L 11337		2.0821	0.84601	18.525	15.6723	38.5709		LN II	A -A1	10	97.2839	<	0.05	<	0.01		0.485		0.335		0.946575		0.0809462		0.854891		0.0035		0.0102
MA-166622		flanged axe, type Emmen	Svendsmark	Praestoe	SAM-8166	NM B7534	L 13180		2.0959	0.85186	18.426	15.6964	38.6191		LN II	A -A1	11	94.0789		0		0.083		2.3695		0.65		0.934784		0.135856		1.71675		0.00595		0
MA-166623		flanged axe, type Emmen	Falster district	Maribo	SAM-8168	NM 20828	L 11339		2.0935	0.85147	18.4	15.667	38.5204		LN II	A -A1	10	97.7891	<	0.05	<	0.01		0.28		0.376		0.911414		0.0503447		0.576361		0.0049		0.0119
MA-166625		flanged axe, type Store-Heddinge	Rye	Copenhagen	SAM-8190	NM B9819	L 11341		2.094	0.85675	18.234	15.622	38.182		LN II	A -A5	10	98.047	<	0.05	<	0.01		0.151		0.232		0.897984		0.102024		0.54354		0.0154		0.01105
MA-166626		flanged axe, type Vaerslev	Trustrup	Randers	SAM-8193	NM B11334	L 11342		2.0871	0.8479	18.488	15.676	38.5863		LN II	A -A4	10	97.5584	<	0.05		0.01		0.296		0.541		0.902099		0.0303677		0.651119		0.0042		0.0068
MA-166627		flanged axe, type Aebelnaes	Horbelev	Maribo	SAM-8194	NM B300	L 11343		2.0882	0.84913	18.451	15.6673	38.5294		LN II	A -A6	10	96.5779		0.562	<	0.01		0.499		0.523		1.02093		0.0637533		0.732726		0.0028		0.01785
MA-166629		flanged axe	Jordloese	Holbaek	SAM-8198	NM B5106	L 11345		2.0921	0.85085	18.421	15.6735	38.5386		LN II	A -A11	10	97.4172	<	0.05		0.014		0.628		0.337		0.853823		0.0462487		0.66527		0.0028		0.0357
MA-166630		flanged axe	Jordloese	Holbaek	SAM-8199	NM B5106	L 11346		2.0854	0.8479	18.462	15.6539	38.5007		LN II	A -A11	10	96.3746	<	0.05	<	0.01		0.041		0.849		0.829901		1.02723		0.82831		0.0049		0.04505
MA-166632		flanged axe, type Vaerslev	Saerslev	Holbaek	SAM-8201	NM B3143	L 11348		2.0909	0.85024	18.434	15.6733	38.5437		LN II	A -A4	11	97.3895	<	0.05		0.012		0.801		0.375		0.735393		0.0284302		0.658632	<	0.005	<	0.005
MA-166633		flanged axe, type Torsted-Tinsdahl	Emmerbølle	Svendborg	SAM-8196	NM B3942	L 13183		2.0833	0.84683	18.485	15.6537	38.5098		LN II	A -B2	4	90.5141		-0.001	<	0.0135		0.246		0.105		0.0100709		9.05178		0.0402184		0.01575		0.003825
MA-166634		flanged axe, type Hjadstrup	Hjadstrup	Odense	SAM-8210	NM 10183	L 11350		2.0871	0.848	18.488	15.6778	38.5863		NBA IA	A -A2	11	96.476	<	0.05		0.041		1.086		0.204		0.799498		0.361035		1.03179	<	0.005	<	0.005
MA-166635		flanged axe, type Torsted-Tinsdahl	Flemloese	Odense	SAM-8211	NM B13356	L 11351		2.0863	0.84238	18.629	15.6927	38.8657		LN II	A -B2	11	92.7979	<	0.05	<	0.01		0.99		1.108		0.197526		4.66334		0.214703		0.0217		0.0068
MA-166636		flanged axe, type Torsted-Tinsdahl	south Fyn	Svendborg	SAM-8212	NM B9391	L 13184		2.0484	0.82786	18.928	15.6697	38.7721		NBA IA	A -B2	4	91.8862		0	<	0.0135		0.3915		0.2495		0.130287		7.10123		0.216004		0.01785		0.005975
MA-166637		flanged axe, type Virring	Stensby	Odense	SAM-8213	NM 16783	L 11353		2.0903	0.85084	18.402	15.6572	38.4657		NBA IA	A -B3	11	94.758	<	0.05	<	0.01		0.3		0.473		0.41046		3.77468		0.277104		0.0042		0.00555
MA-166638		flanged axe, type Torsted-Tinsdahl	Vorbasse	Ribe	SAM-8214	NM B6644	L 11354		2.0926	0.84885	18.446	15.6579	38.6001		NBA IA	A -B2	4	87.4183	<	0.05		0.011		0.398		0.976		0.020314		10.7831		0.245615		0.1477	<	0.005
MA-166639		flanged axe, type Torsted-Tinsdahl	Fjellerup	Randers	SAM-8215	NM B13361	L 11355		2.044	0.81891	19.179	15.7059	39.2019		NBA IA	A -B2	4	92.1279	<	0.05	<	0.01		0.162		0.428		0.0319341		7.16963		0.0742251		0.0063	<	0.005
MA-166640		flanged axe, type Virring	Brejl	Skanderborg	SAM-8216	NM 26072	L 11356		2.0495	0.82834	18.928	15.6788	38.7929		NBA IA	A -B3	4	89.8194	<	0.05	<	0.01		0.368		0.494		0.0600392		9.13889		0.109918		0.0098	<	0.005
MA-166641		flanged axe, type Torsted-Tinsdahl	Ejstrup	Skanderborg	SAM-8218	NM B6822	L 11357		2.0419	0.82286	19.037	15.6648	38.8717		NBA IA	A -B2	4	92.1606	<	0.05	<	0.01		0.223		0.235		0.00975379		7.32243		0.0407886		0.0084	<	0.005
MA-166642		flanged axe, type Torsted-Tinsdahl	Raabjerg	Hjoerring	SAM-8219	NM B10993	L 11358		2.0765	0.84482	18.552	15.6731	38.5232		NBA IA	A -B2	11	93.2488	<	0.05		0.029		1.669		1.5		0.1615		3.15602		0.218341		0.0105		0.0068
MA-166643		flanged axe, type Torsted-Tinsdahl	Pebertved	Svendborg	SAM-8221	NM 20623	L 11359		2.0489	0.82819	18.925	15.6735	38.7754		NBA IA	A -B2	4	92.4158		0.142	<	0.01		0.359		0.472		0.183039		6.18893		0.22392		0.0119		0.0034
MA-166644		flanged axe, type Torsted-Tinsdahl	near Skaelskoer	Soroe	SAM-8225	NM B9390	L 11360		2.0615	0.8283	18.921	15.6723	39.0056		NBA IA	A -B2	4	91.5641	<	0.05		0.01		0.183		0.544		0.00985331		7.64438		0.0250812		0.0196	<	0.005
MA-166645		flanged axe, type Torsted-Tinsdahl	Katrinebjerg	Copenhagen	SAM-8226	NM B9028	L 11361		2.0479	0.82784	18.92	15.6627	38.7463		NBA IA	A -B2	4	92.1857	<	0.05	<	0.01		0.391		0.387		0.136214		6.66614		0.105148		0.1288	<	0.005
MA-166646		flanged axe, type Lanquaid	Magleby	Soroe	SAM-8227	NM B9393	L 11488		2.0468	0.82724	18.92	15.6514	38.7255		NBA IA	A -B4	8	91.0937		0.119	<	0.0135		0.218		0.086		0.00841754		8.44372		0.0112234		0.0119		0
MA-166647		flanged axe, type Virring	Kragebaek	Holbaek	SAM-8235	NM 21075	L 13185		2.0726	0.84353	18.609	15.6972	38.569		NBA IA	A -B3	11	88.7506		-0.0025	<	0.0135		0.751		0.7055		0.193074		9.29572		0.282039		0.00945		0.0051
MA-166648		flanged axe, type Langenfeld	Vindebaekkobbel	Maribo	SAM-8238	NM B5557	L 11489		2.0959	0.85974	18.189	15.6378	38.1223		NBA IA	A -B5	4	89.3234		0.228		0.028		1.9065		0.6805		0.065141		7.61986		0.092896		0.0091		0.005125
MA-166649		flanged axe, type Lanquaid	Jelling	Vejle	SAM-8239	NM B8869	L 11490		2.0525	0.83059	18.846	15.6533	38.6814		NBA IA	A -B4	4	91.0989		0	<	0.0135		0.169		0.2085		0.0289864		8.40416		0.0500978		0.0294	<	0.005
MA-166650		flanged axe,spatula shaped	Thise Hede	Viborg	SAM-8240	NM B9392	L 11491		2.0551	0.83173	18.82	15.6532	38.677		NBA IA	A -B1	11	87.8444		0.054	<	0.0135		1.094		3.61		0.301727		5.98344		0.835995		0.25515		0.003825
MA-166651		flanged axe, type Torsted-Tinsdahl	Fyn	Fyn	SAM-8241	NM 4415	L 11492		2.0493	0.82841	18.908	15.6636	38.7482		NBA IA	A -B2	4	91.5803	<	0.021	<	0.0135		0.435		0.296		0.158996		7.35639		0.152749		0.0245	<	0.005
MA-166652		flanged axe, type Lanquaid	Store Almegaard	Bornholm	SAM-8242	NM B1517	L 11493		2.0644	0.82504	19.034	15.7038	39.2938		NBA IA	A -B4	8	85.8508	<	0.021	<	0.0135		0.0455		0.208		0.00788706		13.8792		0.00956325		0.00315	<	0.005
MA-166653		flanged axe, type Virring	Skoerping	Aalborg	SAM-8248	NM 11820	L 11494		2.0551	0.83344	18.79	15.6603	38.6153		NBA IA	A -B3	11	89.3887	<	0.021	<	0.0135		0.742		1.9275		0.26853		7.53791		0.107468		0.0182		0.004675
MA-166654		flanged axe, type Torsted-Tinsdahl	Nysted	Maribo	SAM-8250	NM B2162	L 11495		2.0466	0.82666	18.955	15.6693	38.7933		NBA IA	A -B2	4	92.9727	<	0.021	<	0.0135		0.305		0.3425		0.176687		6.00947		0.197733		0.00525		0.00425
MA-166655		flanged axe, type Virring		Jutland	SAM-8339	NM B6821	L 11496		2.0479	0.8275	18.923	15.6588	38.7524		NBA IA	A -B3	4	91.7092		0.022	<	0.0135		0.2945		0.442		0.147038		7.08874		0.226506		0.0588		0.003825
MA-166656		flanged axe, type Underaare	Moskjaer	Randers	SAM-8191	NM B4077	L 11497		2.0909	0.85251	18.322	15.6197	38.3095		NBA IA	A -C1	4	90.4748	<	0.021		0.0165		0.3685		0.5735		0.0257297		8.08043		0.0494818		0.4039	<	0.005
MA-170349		flanged axe, type Vaerslev	Bregnhoved	Vejle	SAM-8203	B8688	L 11883		2.082	0.84511	18.543	15.6709	38.6065		LN II	A -A4	10	92.9869		0	<	0.0135		0.1185		0.857		0.555958		4.97498		0.486101		0.0077		0.020825
MA-170350		flanged axe, type Hjadstrup	Odsherred	Holbaek	SAM-8205	B10790	L 11884		2.0922	0.8504	18.446	15.6865	38.5927		LN II	A -A2	11	95.3216		0		0.061		1.948		0.41		0.985925		0.037772		1.22268		0.00525	<	0.005
MA-170352		flanged axe, type Emmen	Fyn	Fyn	SAM-8207	NM 15102	L 11885		2.0912	0.84943	18.467	15.6864	38.6182		LN II	A -A1	11	95.2279		0		0.0655		1.373		0.435		0.878275		0.365052		1.65776		0.0042		0.005975
MA-170353		flanged axe Pseudo-Irisher, type	Selchausdal	Holbaek	SAM-8208	NM 4558	L 11886		2.0773	0.84235	18.595	15.6635	38.6274		LN II	A -A8	10	93.1711		-0.0045	<	0.0135		0.085		0.461		0.40199		5.45143		0.399757		0.0021		0.027625
MA-170354		flanged axe, type Hjadstrup	St. Duegaard	Bornholm	SAM-8209	B704	L 11887		2.0877	0.84654	18.524	15.6813	38.6726		LN II	A -A2	11	92.8339		0		0.1085		1.639		0.825		1.35066		0.484428		2.73295		0.021		0.00425
MA-170355		flanged axe	Svinsbjerg	Maribo	SAM-8217	B6737	L 11888		2.0481	0.82786	18.905	15.6507	38.7193		LN II	A -A11	4	93.3659		0	<	0.0135		0.3885		0.2275		0.106899		5.6131		0.13385		0.1715	<	0.005
MA-170356		flanged axe, type Aebelnaes	Pederstrup	Maribo	SAM-8223	B11127	L 11889		2.0532	0.8302	18.859	15.6567	38.7213		LN II	A -A6	10	94.3206		0	<	0.0135		0.0685		0.359		0.405417		4.57641		0.275975		0.0042		0.006375
MA-170357		flanged axe, type Gallemose	Lillerup	Skanderborg	SAM-8228	B1014	L 11890		2.0489	0.82257	19.072	15.6881	39.0766		LN II	A -A3	4	90.684	<	0.021	<	0.0135		0.0595		0.1015		0.0100913		8.97436		0.152343	<	0.005	<	0.005
MA-170358		flanged axe	Tolne Parish	Hjoerring	SAM-8229	NM 3887	L 11891		2.0442	0.82517	18.995	15.6741	38.8296		LN II	A -A11	4	92.9493		0	<	0.0135		0.346		0.393		0.0996556		6.07131		0.123063		0.01085	<	0.005
MA-170359		flanged axe, type Gallemose	Ellesoe	Odense	SAM-8230	B13577	L 11892		2.0902	0.8521	18.392	15.6718	38.443		LN II	A -A3	10	91.0355		0	<	0.0135		0.0455		0.3935		0.584762		7.51603		0.418532		0.0042		0.014025
MA-170360		flanged axe, type Store-Heddinge	Balslev	Odense	SAM-8231	B2956	L 11893		2.0926	0.85034	18.45	15.6888	38.6085		LN II	A -A5	11	96.6551		0		0.0185		0.8295		0.3025		0.911542		0.565034		0.712595		0.0021		0.005125
MA-170361		flanged axe Anglo-Irish type	near Davrup	Holbaek	SAM-8232	B6678	L 11894		2.1014	0.85939	18.188	15.6306	38.2203		LN II	A -A10	10	87.0776		0.3845	<	0.0135		0.067		0.4275		0.215114		11.1709		0.142054		0.5005		0.012325
MA-170362		flanged axe, type Store-Heddinge	Vindebæk	Praestoe	SAM-8236	NM 19198	L 11895		2.0811	0.84853	18.463	15.6664	38.4233		LN II	A -A5	11	94.1775		0.028		0.1345		3.491		1.211		0.0938235		0.0634119		0.755282		0.00665		0.003825
MA-170363		flanged axe, type Gallemose	Svinninge	Holbaek	SAM-8243	B13980	L 11896		2.0909	0.8499	18.455	15.6849	38.5876		LN II	A -A3	10	95.7368		0		0.0195		0.5825		0.4995		0.97504		1.02608		1.13882		0.00455		0.020825
MA-170364		flanged axe, type Vaerslev	Korselitse	Maribo	SAM-8244	NM 7328	L 11897		2.0952	0.85212	18.401	15.6799	38.5538		LN II	A -A4	10	95.8096		0		0.019		0.844		0.569		1.0796		0.533508		1.09923		0.0161		0.0425
MA-170365		flanged axe, type Gallemose	Store-Toroeje	Praestoe	SAM-8245	B1182	L 11898		2.087	0.8488	18.456	15.6655	38.5177		LN II	A -A3	10	96.3514		0.0015	<	0.0135		0.024		0.956		0.919118		1.08331		0.61664		0.00385		0.037825
MA-170366		flanged axe	Taarup	Maribo	SAM-8247	B12993	L 11899		2.0935	0.85388	18.32	15.6431	38.3529		LN II	A -A11	10	97.7119		0	<	0.0135		0.124		0.5235		0.932042		0.0462836		0.640765		0.0105		0.02975
MA-170367		flanged axe, type Store-Heddinge	Vrold	Skanderborg	SAM-8253	B10464	L 11900		2.0845	0.84609	18.523	15.6721	38.6112		LN II	A -A5	10	96.3972		0	<	0.0135		0.038		1.076		0.710596		1.09406		0.675161	<	0.005		0.0238
MA-170368		flanged axe, type Gallemose	Ørum	Randers	SAM-8256	B7857	L 11901		2.0869	0.84718	18.496	15.6694	38.5993		LN II	A -A3	10	95.793		0	<	0.0135		0.0555		0.388		0.551505		2.85592		0.347828		0.00455		0.01615
MA-170369		flanged axe, type Gallemose	Barritskov	Vejle	SAM-8259	NM 26061	L 11902		2.0918	0.85107	18.398	15.658	38.4849		LN II	A -A3	10	96.8685		0	<	0.0135		0.6105		0.347		0.914926		0.259866		0.980071		0.0042		0.02295
MA-170370		flanged axe, type Hjadstrup	Bygholm	Vejle	SAM-8260	NM 11073	L 11903		2.0751	0.84334	18.6	15.6861	38.5969		LN II	A -A2	11	93.7761		0.5105		0.023		0.7605		0.9595		0.860158		2.51867		0.570151		0.00315		0.00425
MA-170371		flanged axe, type Gallemose	West Lolland	Maribo	SAM-8262	B11683	L 11904		2.0929	0.85094	18.414	15.6692	38.5387		LN II	A -A3	11	96.8614		0.0785		0.017		0.8845		0.3495		0.805864		0.128642		0.855169		0.0056		0.003825
MA-170372		flanged axe, type Gallemose	near Bogense	Odense	SAM-8263	B9092	L 11905		2.0921	0.85066	18.427	15.6751	38.5511		LN II	A -A3	11	96.8543		0		0.0155		0.8765		0.2815		1.0149		0.131843		0.827717		0.00385		0.00595
MA-170373		flanged axe, type Store-Heddinge	Skovballe	Svendborg	SAM-8264	B3240	L 11906		2.0959	0.85341	18.357	15.666	38.4744		LN II	A -A5	10	96.5746		0	<	0.0135		0.254		0.5475		0.888341		1.05083		0.658343		0.00875		0.02465
MA-170374		flanged axe, type Store-Heddinge	Ørnboelle Hede	Hjoerring	SAM-8265	NM 26062	L 11907		2.1007	0.85819	18.245	15.6577	38.3273		LN II	A -A5	4	86.7796		0.029		0.0125		0.2085		2.0995		0.162431		10.4402		0.215172		0.02765		0.005975
MA-170375		flanged axe, type Gallemose	Grinsted	Aalborg	SAM-8266	B1043	L 11908		2.0706	0.83864	18.669	15.6566	38.656		LN II	A -A3	4	92.7392		0.0535		0.012		0.3805		0.43		0.0229078		6.30381		0.0402781		0.0119	<	0.005
MA-170376		flanged axe, type Hjadstrup	Jerslev	Holbaek	SAM-8270	Z99	L 11909		2.0956	0.85225	18.396	15.678	38.5507		LN II	A -A2	11	97.8445		0	<	0.0135		0.6605		0.2115		0.686175		0.109934		0.474539		0.00665	<	0.005
MA-170377		flanged axe, type Gallemose	Pederstrup	Copenhagen	SAM-8271	B1094	L 11910		2.0793	0.84411	18.577	15.681	38.6272		LN II	A -A3	10	97.3163		0	<	0.0135		0.1465		0.986		0.948114		0.0135447		0.579987		0.00245		0.01785
MA-170378		flanged axe, type Vaerslev	Alsoenderup	Frederiksborg	SAM-8272	B3484	L 11911		2.0927	0.85204	18.372	15.6537	38.4471		LN II	A -A4	10	96.755		0.137	<	0.0135		0.058		0.989		1.13618		0.00583044		0.796106		0.01855		0.09945
MA-170379		flanged axe, type Hjadstrup		Sealand	SAM-8274	B2430	L 11912		2.0865	0.84707	18.515	15.6835	38.6315		LN II	A -A2	11	95.5709	<	0.021		0.0425		1.6085		0.3815		0.977631		0.213807		1.18653		0.0021		0.005125
MA-170380		flanged axe, type Hjadstrup	Ubberup	Holbaek	SAM-8275	B6816	L 11913		2.0871	0.8501	18.43	15.6673	38.4653		LN II	A -A2	10	94.9011		0	<	0.0135		0.0305		0.6395		0.634847		3.36579		0.412214		0.00315		0.0221
MA-170381		flanged axe, type Emmen	Odsherred	Holbaek	SAM-8276	B10791	L 11914		2.0902	0.84965	18.452	15.6777	38.5684		LN II	A -A1	11	96.7628		0	<	0.0135		0.2855		0.352		0.635126		1.54787		0.404052		0.00315		0.004675
MA-170382		flanged axe, type Gallemose	Tranderupgaard	Soroe	SAM-8277	B10821	L 11915		2.0905	0.85007	18.43	15.6668	38.5279		LN II	A -A3	10	96.1064		0		0.0325		0.499		0.936		1.07481		0.266561		1.02999		0.01575		0.045475
MA-170383		flanged axe, type Gallemose	Havdrup	Copenhagen	SAM-8279	B11333	L 11916		2.0918	0.85119	18.405	15.6662	38.4996		LN II	A -A3	11	97.399		0		0.0115		0.618		0.341		0.87183		0.060558		0.691077		0.01225		0.0034
MA-170384		flanged axe, type Gallemose	near Praesto	Praestoe	SAM-8280	NM 2870	L 11917		2.0922	0.85078	18.423	15.6739	38.5446		LN II	A -A3	11	97.5303		6.93889e-18		0.0085		0.506		0.2685		0.938721		0.111293		0.607999		0.0126		0.0051
MA-170385		flanged axe, type Aebelnaes	Odsherred	Holbaek	SAM-8283	B10789	L 11918		2.0743	0.84435	18.472	15.5968	38.3165		LN II	A -A6	9	93.948		0		0		0.015		0.0135		0.0107622		6.02985	<	0.005	<	0.005		0
MA-170386		flanged axe, type Store-Heddinge	Ramsoegaard	Copenhagen	SAM-8285	NM 6838	L 11919		2.0918	0.85073	18.422	15.6721	38.5351		LN II	A -A5	10	97.8262		0	<	0.0135		0.279		0.2875		0.901473		0.051141		0.657831		0.0028		0.0102
MA-170387		flanged axe, type Hjadstrup		Denmark	SAM-8349	NM 26060	L 11920		2.093	0.84931	18.475	15.691	38.6682		LN II	A -A2	11	94.0554		0		0.074		3.242		0.88		0.478909		0.00331317		1.24213		0.00455	<	0.005
MA-170388		flanged axe Anglo-Irish type	Selchausdal	Holbaek	SAM-8417	B5310	L 11921		2.08	0.84922	18.449	15.6673	38.3739		LN II	A -A10	9	91.1746		0.0815	<	0.0135		0.0195		0.186		0.00789288		8.4909		0.0022652		0.01785		0.005975
MA-170389		flanged axe, type Store-Heddinge	Gallemose	Randers	SAM-8440	B3887	L 11922		2.0922	0.85135	18.384	15.6512	38.463		LN II	A -A5	12	95.3957		-0.003	<	0.0135		0.013		1.4625		1.21246		0.470855		1.23748		0.02905		0.178925
MA-170390		flanged axe, type Vaerslev	Gallemose	Randers	SAM-8441	B3888b	L 11923		2.0844	0.84767	18.484	15.6683	38.528		LN II	A -A4	10	91.5196		0	<	0.0135		0.234		0.4875		0.2747		7.14276		0.312377		0.0105		0.013175
MA-170391		flanged axe, type Aebelnaes	Gallemose	Randers	SAM-8442	B3888c	L 11924		2.0844	0.84569	18.541	15.6799	38.6469		LN II	A -A6	10	95.9432		0		0.0195		0.512		1.189		1.05885	<	0.005		1.20187		0.00945		0.064175
MA-170392		flanged axe, type Gallemose	Gallemose	Randers	SAM-8443	B3888d	L 11925		2.0902	0.85059	18.404	15.6543	38.468		LN II	A -A3	12	96.8319		0	<	0.0135		0.0105		1.1515		1.08681	<	0.005		0.863609		0.0056		0.0697
MA-170393		flanged axe, type Gallemose	Gallemose	Randers	SAM-8444	B3888e	L 11926		2.0755	0.84242	18.599	15.6682	38.6022		LN II	A -A3	12	97.2244		0	<	0.0135		0.0115		0.6915		1.24234	<	0.005		0.767027		0.00385		0.0697
MA-170394		flanged axe, spatula shaped	Gallemose	Randers	SAM-8445	B3888f	L 11927		2.0907	0.84913	18.455	15.6707	38.5839		LN II	A -B1	11	96.0681		0		0.0215		1.0185		0.3155		0.973307		0.578559		1.00782		0.0084		0.0085
MA-170395		flanged axe, type Gallemose	Gallemose	Randers	SAM-8446	B3888g	L 11928		2.0939	0.85176	18.404	15.6758	38.5361		LN II	A -A3	10	97.3743		0	<	0.0135		0.394		0.257		1.18216		0.120267		0.662951		0.0028		0.019125
MA-170396		"Blutegelring"	Gallemose	Randers	SAM-8447	B3889	L 11929		2.0912	0.85215	18.363	15.648	38.4007		LN II	Blutegelring	12	95.6237		0.028	<	0.0135		0.019		1.726		1.36425	<	0.005		1.06394		0.01365		0.153425
MA-170397		open ring	Gallemose	Randers	SAM-8449	B3891a	L 11930		2.0848	0.84692	18.497	15.6655	38.5625		LN II	open ring	12	96.1367		0.034	<	0.0135		0.0115		1.1715		1.57015		0.0241599		0.948202		0.0091		0.0867
MA-170398		open ring	Gallemose	Randers	SAM-8450	B3891b	L 11931		2.0913	0.85114	18.392	15.6542	38.4632		LN II	open ring	12	95.4215	<	0.021	<	0.0135		0.022		1.638		1.58872	<	0.005		1.10581		0.02625		0.175525
MA-170399		open ring	Gallemose	Randers	SAM-8451	B3891c	L 11932		2.0903	0.85131	18.377	15.6445	38.4134		LN II	open ring	10	96.258		0.0205	<	0.0135		0.1775		0.724		1.99805		0.0571621		0.670062		0.0259		0.05185
MA-170400		open ring	Gallemose	Randers	SAM-8452	B3891d	L 13188		2.0909	0.85084	18.399	15.6546	38.4705		LN II	open armring	12	96.0655		0	<	0.0135		0.0135		1.6575		1.1814		0.0548517		0.900473		0.01155		0.120275
MA-170401		open ring	Gallemose	Randers	SAM-8453	B3891e	L 11933		2.0883	0.85143	18.37	15.6408	38.3621		LN II	open ring	12	95.8613		0.057	<	0.0135		0.0165		1.661		1.42739		0.0216324		0.737471		0.01435		0.184875
MA-170402		open ring	Gallemose	Randers	SAM-8454	B3891f	L 11934		2.0939	0.85464	18.285	15.6271	38.287		LN II	open ring	12	93.425		0.0485	<	0.0135		0.016		2.3785		2.66398		0.0288865		0.975537		0.09555		0.331925
MA-170403		open ring	Gallemose	Randers	SAM-8455	B3891g	L 13189		2.0892	0.85018	18.416	15.6569	38.4747		LN II	open armring	12	96.179		0	<	0.0135		0.0215		1.3575		1.19926	<	0.005		1.11924		0.0021		0.1173
MA-170404		hook	Gallemose	Randers	SAM-8456	B3885a	L 13190		2.0903	0.85045	18.423	15.6678	38.5096		LN II	hook	10	94.5885		0.02	<	0.0135		0.177		0.896		1.15868		2.05662		1.04483		0.0175		0.031875
MA-170405		hook	Gallemose	Randers	SAM-8457	B3885b	L 13191		2.0892	0.85004	18.428	15.6645	38.4998		LN II	hook	10	94.1374		0.0475	<	0.0135		0.1825		0.834		1.25563		2.47694		1.01276		0.01715		0.025925
MA-170406		hook	Gallemose	Randers	SAM-8458	B3886	L 11935		2.0919	0.85115	18.396	15.6578	38.4826		LN II	hook	10	95.4913		0.0785	<	0.0135		0.082		0.731		1.24141		1.4717		0.841199		0.01225		0.044625
MA-170407		flanged axe Anglo-Irish type	Store-Heddinge	Praestoe	SAM-8461	NM MLXIX	L 13192		2.0948	0.855	18.315	15.6593	38.3663		LN II	A -A10	8	87.0667	<	0.0075		0		0.022		0.0495		0.0117253		12.8167		0.0118746		0.0056	<	0.005
MA-170408		flanged axe, Pseudo-Irisch type	Store-Heddinge	Praestoe	SAM-8462	NM MLXXa	L 13193		2.0828	0.84555	18.517	15.657	38.5672		LN II	A -A8	4	88.0828		0.045	<	0.0135		0.0795		0.0835		0.232756		11.2585		0.191155		0.01365	<	0.005
MA-170410		flanged axe, type Store-Heddinge	Store-Heddinge	Praestoe	SAM-8464	NM MLXXc	L 11936		2.1034	0.86112	18.163	15.6405	38.2041		LN II	A -A5	10	91.0068		0.105	<	0.0135		0.087		0.488		0.628467		6.96419		0.425049		0.25165		0.036975
MA-170411		flanged axe Anglo-Irish type	Lumby Torp	Odense	SAM-11895	NM 2730	L 11938		2.0842	0.84912	18.403	15.6264	38.3555		LN II	A -A10	8	92.6605		0	<	0.0135		0.019		0.102		0.0122415		7.19816		0.00869171		0.007	<	0.005
MA-170412		flanged axe, type Gallemose	Lumby Torp	Odense	SAM-11896	NM 2731	L 11939		2.0904	0.85055	18.41	15.6586	38.4843		LN II	A -A3	10	97.7135		0	<	0.0135		0.0735		0.2765		1.06081		0.145678		0.702344		0.00595		0.041225
MA-170413		flat axe shaped	Lumby Torp	Odense	SAM-11897	NM 2732	L 11940		2.091	0.85106	18.402	15.6612	38.4786		LN II	Typ 8	10	97.2735		0		0.013		0.6405		0.3985		0.774312		0.136919		0.752832		0.00595		0.0136
MA-170414		flanged axe, type Virring		Denmark	SAM-8421	NM NM	L 11941		2.0958	0.85186	18.392	15.6674	38.546		LN II	A -B3	4	92.1982		0	<	0.0135		0.3295		0.4435		0.152834		6.64279		0.130805		0.10465		0.003825
MA-170415		flanged axe, type Virring	Øster-Melleruo	Hjoerring	SAM-8422	B3494	L 11942		2.0769	0.8428	18.616	15.6896	38.6636		NBA IA	A -B3	11	95.4548		0	<	0.0135		0.1255		0.2215		0.469594		3.40626		0.334085		0.00245		0.0034
MA-170416		flanged axe, type Virring	Hudevad	Odense	SAM-8423	NM 10724	L 11943		2.0592	0.83439	18.768	15.6598	38.6471		NBA IA	A -B3	4	91.8251		0	<	0.0135		0.3395		0.392		0.0848376		7.20953		0.133632		0.01365	<	0.005
MA-170417		flanged axe, type Virring	Kvaerkeby	Soroe	SAM-8433	B10736	L 11944		2.0507	0.82889	18.892	15.6594	38.7418		NBA IA	A -B3	10	92.6066		0	<	0.0135		0.319		0.708		0.333017		5.55435		0.45208		0.0168		0.009775
MA-170418		flanged axe, type Virring	near Silkeborg	Skanderborg	SAM-8434	NM 26073	L 11945		2.0878	0.84787	18.473	15.6627	38.5679		NBA IA	A -B3	4	90.0051		0.011		0.0115		0.3475		0.537		0.0425141		8.97282		0.059178		0.01015		0.001275
MA-170419		flanged axe, type Virring		Denmark	SAM-8467	NM B4489	L 13195		2.0891	0.84871	18.46	15.6672	38.5648		NBA IA	A -B3	4	90.0159		0	<	0.0135		0.2435		0.4765		0.0781251		8.90589		0.189321		0.0882		0.00555
MA-170420		flanged axe, type Virring		Denmark	SAM-8468	NM B13535	L 13196		2.1026	0.85424	18.282	15.6172	38.4397		NBA IA	A -B3	4	91.0375	<	0.0185		0.0095		0.3655		0.394		0.109696		7.74041		0.265083		0.04025		0.006375
MA-170421		flanged axe, type Virring	Skenkelsoe	Frederiksborg	SAM-8473	NM 20948	L 11946		2.0473	0.82754	18.916	15.6537	38.7267		NBA IA	A -B3	4	91.4858		0.077	<	0.0135		0.311		0.222		0.0838549		7.55377		0.145482		0.1029		0.005125
MA-170422		flanged axe, type Virring	Skannerup	Skanderborg	SAM-8476	B8687	L 11947		2.0533	0.82676	18.959	15.6745	38.9285		NBA IA	A -B3	4	87.3794		0.0575	<	0.0135		0.3715		0.734		0.0399788		11.3523		0.0438383		0.0112	<	0.005
MA-170423		flanged axe, type Virring	Virring	Randers	SAM-8500	B3962	L 11948		2.0588	0.83477	18.699	15.6094	38.4975		NBA IA	A -B3	4	91.8159		0	<	0.0135		0.511		0.414		0.0774842		7.07089		0.0996205		0.01785	<	0.005
MA-170424		flanged axe, type Torsted-Tinsdahl	Virring	Randers	SAM-8501	B3963	L 11949		2.0516	0.82961	18.875	15.6589	38.724		NBA IA	A -B2	10	94.877		0	<	0.0135		0.468		0.597		0.210325		3.50265		0.326248		0.01575		0.01105
MA-170425		flanged axe, type Torsted-Tinsdahl	Tjaereby	Copenhagen	SAM-11833	141/53	L 11950		2.0521	0.82991	18.877	15.6662	38.7375		NBA IA	A -B2	10	90.8984		-0.0005	<	0.0135		0.5235		0.736		0.446471		6.87465		0.469636		0.01435		0.028475
MA-170426		flanged axe, type Torsted-Tinsdahl	Simmerboelle	Svendborg	SAM-11847	B98	L 11951		2.0474	0.82738	18.927	15.6598	38.7511		NBA IA	A -B2	4	93.7738		0	<	0.0135		0.433		0.407		0.134732		5.0339		0.180611		0.0378		0.00425
MA-170427		flanged axe, type Virring	Skovsbogaard	Odense	SAM-11863	NM 9708	L 11952		2.0474	0.82734	18.921	15.6541	38.7389		NBA IA	A -B3	4	93.0876		0		0.006		0.5635		0.467		0.153259		5.49869		0.183838		0.0413	<	0.005
MA-170428		flanged axe, type Virring	North Fyn	Odense	SAM-11882	CM71	L 11953		2.0469	0.82726	18.92	15.6518	38.7273		NBA IA	A -B3	4	91.446		0.0405	<	0.0135		0.312		0.4335		0.172859		7.28993		0.12426		0.1743		0.005125
MA-170429		flanged axe, type Torsted-Tinsdahl	Skaerbaek Moelle	Haderslev	SAM-11905	CM107	L 11954		2.0506	0.82861	18.914	15.6723	38.785		NBA IA	A -B2	4	92.3023		0	<	0.0135		0.258		0.382		0.161434		6.70192		0.180996		0.01225		0.004675
MA-170430		flanged axe, type Torsted-Tinsdahl	Langebjerg Mose	Odense	SAM-11913	NM 1669	L 11955		2.0719	0.84314	18.541	15.6327	38.4151		NBA IA	A -B2	4	93.1109		0	<	0.0135		0.315		0.4405		0.0705796		5.87556		0.164154		0.02625		0.00555
MA-170431		flanged axe, type Torsted-Tinsdahl		Sealand	SAM-11919	CM146	L 11956		2.0474	0.82757	18.918	15.656	38.7327		NBA IA	A -B2	10	91.4485		-0.0015	<	0.0135		0.279		0.3905		0.270511		7.33104		0.211209		0.0553		0.008075
MA-170432		flanged axe, type Virring	Saksgaard	Soenderborg	SAM-11942	NM 356	L 11957		2.0459	0.8265	18.959	15.6696	38.7882		NBA IA	A -B3	4	92.4004		0.011	<	0.0135		0.244		0.3165		0.176695		6.64051		0.188693		0.0091		0.0051
MA-170433		flanged axe, type Virring	Als	Soenderborg	SAM-11956	NM 1488	L 11958		2.0489	0.82818	18.912	15.6625	38.7488		NBA IA	A -B3	4	92.4246		0.0135		0.01		0.5185		0.2375		0.0912231		6.52746		0.144619		0.0273	<	0.005
MA-170434		flanged axe, type Virring		Denmark	SAM-11963	NM 2540	L 11959		2.08	0.84502	18.557	15.681	38.5986		NBA IA	A -B3	11	92.5176		0		0.0115		1.0955		0.8		0.19791		5.11413		0.255818		0.0119		0.005125
MA-170435		flanged axe, type Virring	Ejstrup Holm	Skanderborg	SAM-11970	B108	L 11960		2.0734	0.83912	18.611	15.6169	38.588		NBA IA	A -B3	4	91.2474		0	<	0.0135		0.476		0.3415		0.0810097		7.75472		0.0920486		0.0147	<	0.005
MA-170436		flanged axe, type Torsted-Tinsdahl	Tvingstrup	Skanderborg	SAM-11978	Horsens A2	L 11961		2.0688	0.83297	18.808	15.6665	38.91		NBA IA	A -B2	8	93.5275		0.0385	<	0.0135		0.0625		0.039		0.00578197		6.30755		0.00327205		0.0035		0
MA-170437		flanged axe, type Virring	Aabjerg	Ringkoebing	SAM-11984	Ringk. 1710A	L 11962		2.0465	0.82705	18.923	15.6503	38.7259		NBA IA	A -B3	4	92.2116		0	<	0.0135		0.251		0.144		0.10156		7.06654		0.115728		0.10885		0.005125
MA-170438		flanged axe, type Torsted-Tinsdahl	Handrup Odde	Thisted	SAM-11986	Thisted 1204	L 11963		2.0718	0.84385	18.526	15.6332	38.3822		NBA IA	A -B2	11	90.8108		0	<	0.0135		0.363		0.48		0.740373		7.24977		0.34695		0.00945		0.004675
MA-170439		flanged axe, type Torsted-Tinsdahl		Denmark	SAM-11994	VHM 13835	L 11964		2.0514	0.82946	18.877	15.6577	38.7243		NBA IA	A -B2	4	91.3152		0	<	0.0135		0.2615		0.1745		0.104456		8.05938		0.0671361		0.01855		0.000425
MA-170440		flanged axe, type Virring	West Himmerland	Aalborg	SAM-12015	Hobro 1001A	L 11965		2.0503	0.82967	18.862	15.6492	38.6728		NBA IA	A -B3	4	91.1435		0.0485	<	0.0135		0.3345		0.352		0.0468952		7.81411		0.0545814		0.1932	<	0.005
MA-170441		flanged axe, type Torsted-Tinsdahl	Kildemosen	Frederiksborg	SAM-8222	B10900	L 11966		2.0466	0.82718	18.917	15.6478	38.7155		NBA IA	A -B2	4	88.6268		0.093	<	0.0135		0.5485		0.388		0.0363123		10.0659		0.0923857		0.12565		0.005975
MA-171058		flat axe, type 2	Soerup Mark	Svendborg	SAM-2735	FHM 2994	L 11971		1.718	0.70739	22.473	15.8972	38.6086		NBA IA	flat axe 2	4	98.9999		0		0.002		0.2895		0.634		0.0236662		0.0043617		0.0582881		0.00385		0.008075
MA-171063		flanged axe, type Aebelnaes	Aebelnaes	Praestoe	SAM-8197	B949	L 11976		2.0841	0.84652	18.513	15.6716	38.5829		LN II	A A6	10	96.4463		0		0.0005		0.0765		1.183		1.12291		0.170796		0.952892		0.0035		0.058225
MA-171064		flanged axe, type Aebelnaes	Aebelnaes	Praestoe	SAM-8420	B949 (1)	L 11977		2.09	0.84998	18.43	15.6651	38.5187		LN II	A -A6	10	96.8562		0		0.004		0.0865		1.1965		1.07597		0.00510067		0.764253		0.00315		0.025925
MA-171065		halberd, type 3	Hvornum	Randers	SAM-8407	B6469	L 11978		2.0968	0.8537	18.304	15.6261	38.3798		LN II	halberd	5	98.7055		0		0.002		0.021		1.192		0.0260052		0.0264669		0.0123046		0.02905		0.003825
MA-171066		halberd, type 3	Sandager	Svendborg	SAM-8408	B6676	L 11979		2.0996	0.85502	18.275	15.6255	38.3702		LN II	halberd	6	98.7467		0		0.0025		0.0075		1.1225		0.0518189		0.010801		0.00481787		0.02765		0.0187
MA-171068		halberd, type 2, blade	Pederstrup	Copenhagen	SAM-8410	B5118	L 11980		2.1059	0.85984	18.173	15.6259	38.2705		LN II	halberd	4	91.8398		0.833		0.002		0.122		0.8225		0.122063		6.05528		0.1828		0.0098	<	0.005
MA-171069		halberd, type 2, nit	Pederstrup	Copenhagen	SAM-8411	B5118	L 11981		2.0847	0.84804	18.422	15.6226	38.4043		LN II	halberd	11	97.3432		0	<	0.0135		0.6985		0.326		0.563043		0.100866		0.968999		0.00245		0.005975
MA-171070		halberd, type 1	Lejregaard	Copenhagen	SAM-8413	B11203	L 11982		2.0871	0.84741	18.53	15.7025	38.674		LN II	halberd	11	94.9389		-0.003	<	0.0135		2.0805		0.5805		0.972018		0.0149789		1.3286		0.0035	<	0.005
MA-171071		halberd, type 1	Veksoe	Frederiksborg	SAM-8414	B3855	L 11983		2.0965	0.85272	18.382	15.6747	38.5379		LN II	halberd	13	97.2399		0		0.0045		0.828		0.021		0.958149		0.0289727		0.83743		0.08225		0.000425
MA-171073		flanged axe, type Vaerslev	Magleholm	Maribo	SAM-8418	NM 16201	L 11985		2.0926	0.8526	18.363	15.6563	38.4264		LN II	A -A4	10	93.8305		0	<	0.0135		0.445		0.8885		0.877053		3.14082		0.765826		0.0091		0.04165
MA-171074		flanged axe, type Vaerslev	Amidgaard	Randers	SAM-8419	B8068	L 11986		2.093	0.85062	18.441	15.6863	38.597		LN II	A -A4	11	93.2355		0		0.084		1.711		0.7		1.07926		1.38431		1.80191		0.0063	<	0.005
MA-171075		flanged axe, type Vaerslev		Denmark	SAM-8424	B4487	L 11987		2.0999	0.85763	18.261	15.6612	38.3463		LN II	A -A4	10	91.6424		0	<	0.0135		0.1515		0.39		0.436352		6.89954		0.450886		0.0126		0.0187
MA-171076		flanged axe, type Emmen		Denmark	SAM-8427	NM	L 11988		2.093	0.85071	18.437	15.6845	38.5886		LN II	A -A1	11	94.5406		0		0.059		2.4105		0.7955		0.723238		0.100347		1.33565		0.00525		0.00555
MA-171077		flanged axe, type Vaerslev	near Aalborg	Aalborg	SAM-8429	NM 26067	L 11989		2.0875	0.8496	18.421	15.6505	38.4538		LN II	A -A4	10	91.4019		-0.0025		0.0015		0.0505		0.554		0.478821		7.13083		0.34107		0.0189		0.02125
MA-171078		flanged axe, type Store-Heddinge	Herslev	Holbaek	SAM-8431	NM 11011	L 11990		2.0891	0.84923	18.454	15.6717	38.5523		LN II	A -A5	11	95.7869		0		0.023		0.832		0.5155		1.19199		0.457904		1.18788		0.0056		0.00935
MA-171080		flanged axe, type Vaerslev	Vaerslev	Holbaek	SAM-8437	B3647	L 11992		2.0917	0.85367	18.313	15.6333	38.3053		LN II	A -A4	10	93.4259		0	<	0.0135		0.333		0.6835		0.67837		4.04989		0.781505		0.01435		0.029325
MA-171081		flanged axe, type Vaerslev	Vaerslev	Holbaek	SAM-8438	B3688	L 11993		2.0985	0.85447	18.294	15.6317	38.39		LN II	A -A4	10	94.4935		0.4185		0.0015		0.1345		0.881		0.787384		2.72596		0.51262		0.0126		0.02805
MA-171082		flanged axe, type Vaerslev		Denmark	SAM-8465	DXCIX	L 11994		2.0958	0.85267	18.38	15.6721	38.5208		LN II	A -A4	10	95.9428		0	<	0.0135		0.2135		0.8595		1.10106		1.04125		0.795929		0.02415		0.03485
MA-171083		flanged axe, type Aebelnaes		Denmark	SAM-8469	B13536	L 11995		2.0843	0.84877	18.441	15.6522	38.4366		LN II	A -A6	10	97.3434		0		0.001		0.1195		0.359		0.7095		1.00308		0.449625		0.0021		0.0238
MA-171084		flanged axe, Pseudo-Irisch type	Flenstofte	Odense	SAM-8472	FHM 26063	L 11996		2.093	0.85474	18.287	15.6306	38.2747		LN II	A -A8	10	93.9999		0	<	0.0135		0.341		0.8025		0.856039		3.21285		0.765504		0.014		0.016575
MA-171085		flanged axe, type Vaerslev	Jordloese	Holbaek	SAM-8474	B13576	L 11997		2.0879	0.8494	18.432	15.6561	38.4842		LN II	A -A4	12	96.6204		0		0.002		0.0195		1.402		1.07785		0.00498347		0.748651		0.00245		0.138125
MA-171086		flanged axe, type Vaerslev		Denmark	SAM-8475	B4486	L 11998		2.095	0.85006	18.469	15.6998	38.6926		LN II	A -A4	11	96.4129		0		0.026		1.505		0.1485		0.712329		0.33051		0.854905		0.0035	<	0.005
MA-171087		flanged axe, type Vaerslev	Kalundborg	Holbaek	SAM-8477	Hol 16823	L 11999		2.0931	0.85284	18.352	15.6513	38.4126		LN II	A -A4	10	97.4872		0		0.004		0.2635		0.5505		0.963069		0.10453		0.623241		0.0098		0.01615
MA-171090		flanged axe, type Emmen	Spaanbaekgaard	Holbaek	SAM-11832	Hol 9655	L 12002		2.0474	0.83093	18.889	15.6954	38.6733		LN II	A -A1	11	94.5129		0	<	0.0135		0.306		0.559		1.07207		3.27965		0.268765		0.0028	<	0.005
MA-171091		flanged axe, type Emmen		Denmark	SAM-11835	Nt 1015/265	L 12003		2.0936	0.85102	18.44	15.6928	38.606		LN II	A -A1	11	94.9492		0		0.041		2.261		0.4715		0.850112		0.138917		1.28576		0.0035		0
MA-171092		flanged axe, type Gallemose	near Maribo	Maribo	SAM-11840	Maribo H25a	L 12004		2.0925	0.85041	18.433	15.6756	38.5711		LN II	A -A3	11	94.1083		0.025		0.0415		1.162		0.3925		1.23467		1.41243		1.58712		0.01855		0.005525
MA-171093		flanged axe, type Gallemose	near Maribo	Maribo	SAM-11841	Maribo H25b	L 12005		2.0931	0.85196	18.377	15.6565	38.4649		LN II	A -A3	10	97.6887		0.126		0.001		0.0605		0.5085		0.998608		0.0436905		0.552442		0.00525		0.0153
MA-171094		flanged axe, type Store-Heddinge	Idestrup	Maribo	SAM-11846	Maribo 770	L 12006		2.0925	0.85152	18.389	15.6586	38.479		LN II	A -A5	10	96.3189		0.012	<	0.0135		0.3355		0.93		0.999076		0.610852		0.757907		0.0098		0.0136
MA-171095		flanged axe, type Gallemose	Humble	Svendborg	SAM-11848	Rud. B87	L 12007		2.0794	0.84524	18.53	15.6623	38.5313		LN II	A -A3	10	93.1289		0		0.0025		0.094		1.2665		0.804131		3.88426		0.74729		0.0042		0.080325
MA-171096		flanged axe, type Gallemose	Vendsted Mose	Svendborg	SAM-11850	Sven. 11243	L 12008		2.0902	0.85006	18.413	15.6522	38.4869		LN II	A -A3	11	95.8488		0		0.032		1.291		0.357		0.977729		0.21742		1.26761		0.0098		0.005125
MA-171098		flanged axe, type Gallemose	Refs-Vindinge	Svendborg	SAM-11865	FSM B581	L 12010		2.0938	0.85205	18.389	15.6683	38.5029		LN II	A -A3	11	98.2883		0		0.002		0.203		0.072		0.780002		0.288595		0.37677		0.0049		0.0034
MA-171099		flanged axe	Glavendrup Mark	Odense	SAM-11866	FSM 2650	L 12011		2.0878	0.84918	18.461	15.6767	38.5429		LN II	A -A11	10	96.4317		0	<	0.0135		0.3195		0.5245		0.746194		1.3471		0.611766		0.0028		0.0187
MA-171100		flanged axe, type Vaerslev	Falsled	Svendborg	SAM-11867	FSM A395	L 12012		2.0904	0.85119	18.4	15.6619	38.4634		LN II	A -A4	10	94.1609		0.2245	<	0.0135		0.2065		0.9105		0.463552		3.6109		0.38612		0.00805		0.01445
MA-171101		flanged axe, type Store-Heddinge	Holmdrup	Svendborg	SAM-11868	FSM 8882	L 12013		2.0877	0.85261	18.325	15.6241	38.2571		LN II	A -A5	10	92.953		0.0715	<	0.0135		0.252		0.65		0.577138		4.90881		0.551379		0.00245		0.021675
MA-171102		flanged axe, type Pseudo-Irish	Faaborg	Svendborg	SAM-11869	FSM 27.6.1886	L 12014		2.0843	0.84849	18.45	15.6546	38.4553		LN II	A -A8	10	94.093		0		0.0025		0.1715		0.4255		0.692434		4.15037		0.45695		0.00455		0.01615
MA-171103		flanged axe, type Hjadstrup	Øster-Lunde	Odense	SAM-11870	FSM CM104	L 12015		2.0926	0.85307	18.355	15.6581	38.4097		LN II	A -A2	11	93.3131		0		0.0175		1.21		0.3475		0.785235		2.93705		1.38487		0.007	<	0.005
MA-171104		flanged axe, type Store-Heddinge	Glavendrup	Odense	SAM-11872	FSM 2649	L 12016		2.093	0.8515	18.4	15.6676	38.5112		LN II	A -A5	10	94.7795		0.1145		0.002		0.2455		0.6485		0.730032		2.83737		0.601979		0.00455		0.0323
MA-171105		flanged axe, type Gallemose	Kvaerndrupvaenge	Svendborg	SAM-11873	FSM 4751	L 12017		2.0844	0.84784	18.487	15.674	38.5343		LN II	A -A3	10	95.6533		0		0.002		0.0375		0.6145		0.668528		2.53741		0.489651		0.0035		0.0136
MA-171106		flanged axe, type Gallemose	Bogense	Odense	SAM-11875	FSM 4009	L 12018		2.0992	0.85658	18.273	15.6523	38.3587		LN II	A -A3	10	95.2985		0		0.022		0.4505		0.6645		0.744771		2.03036		0.766938		0.0196		0.014875
MA-171107		flanged axe, type Gallemose	Skibby	Frederiksborg	SAM-11901	FSM CM142	L 12559		2.1033	0.86089	18.168	15.6406	38.2128		LN II	A -A3	11	95.2697		0		0.034		1.449		0.4415		0.842609		0.782371		1.17879		0.007		0
MA-171108		flanged axe, type Emmen		Sealand	SAM-11903	FSM CM99	L 12560		2.0952	0.85241	18.373	15.6613	38.4951		LN II	A -A1	11	97.2849		0	<	0.0135		0.5845		0.289		0.915866		0.242047		0.655041		0.03185		0.0034
MA-171109		flanged axe, type Store-Heddinge	Knorborg	Haderslev	SAM-11906	FSM 496	L 12561		2.0943	0.85315	18.339	15.6459	38.4074		LN II	A -A5	10	91.9154		0		0.0025		0.111		0.888		0.682572		5.64319		0.638786		0.11655		0.01955
MA-171110		flanged axe, type Gallemose	Brandslund	Odense	SAM-11912	FSM B294	L 12562		2.0936	0.85679	18.226	15.6159	38.158		LN II	A -A3	10	95.4199		0		0.0035		0.137		0.4275		0.833726		2.4874		0.62411		0.0588		0.01955
MA-171111		flanged axe, type Gallemose		Denmark	SAM-11916	FSM 4061	L 12563		2.0916	0.85036	18.456	15.6942	38.6026		LN II	A -A3	11	95.8507		0		0.0155		1.1995		0.157		0.841145		1.21341		0.72711		0.0042		0
MA-171112		flanged axe, type Store-Heddinge	Nustrup Parish	Haderslev	SAM-11934	HAD 795	L 12564		2.0887	0.8473	18.496	15.6717	38.6326		LN II	A -A5	11	96.1214		0		0.0165		1.113		0.2405		1.08715		0.326034		1.09884		0.00665	<	0.005
MA-171113		flanged axe, type Store-Heddinge	Mjang	Soenderborg	SAM-11943	SØM 4218	L 12565		2.0937	0.85459	18.299	15.6381	38.3126		LN II	A -A5	10	95.5786		0		0.004		0.297		0.5955		0.865235		1.81438		0.815661		0.01085		0.02295
MA-171114		flanged axe	Skodsboel	Soenderborg	SAM-11944	SØM 3198	L 12566		2.0933	0.85434	18.303	15.637	38.3137		LN II	A -A11	10	97.3908		0.0265		0.001		0.077		0.6395		0.896099		0.277747		0.636182		0.00945		0.0425
MA-171115		flanged axe, type Gallemose	Skodsboel	Soenderborg	SAM-11945	SØM 3197	L 12567		2.0827	0.84113	18.641	15.6795	38.8236		LN II	A -A3	10	97.2203		0.317		0.001		0.0705		0.3125		0.692522		0.826656		0.531303		0.00315		0.019125
MA-171116		flanged axe, type Emmen	Aabenraa County	Aabenraa	SAM-11948	AA901	L 12568		2.0896	0.84999	18.419	15.656	38.4883		LN II	A -A1	10	97.0916		0		0.003		0.036		0.7015		0.699968		0.857392		0.590044		0.0056		0.036975
MA-171118		flanged axe	Kalvoe	Haderslev	SAM-11952	AA896	L 12570		2.0921	0.85078	18.417	15.6688	38.5302		LN II	A -A11	10	98.5091		0		0.002		0.122		0.19		0.736164		0.0511703		0.389056		0.00385		0.01615
MA-171119		flanged axe, type Anglo-Isrish	Odder	Horsens	SAM-11974	Horsens A4	L 12571		2.0947	0.84688	18.489	15.658	38.7289		LN II	A -A10	8	86.925		0.014		0.002		0.033		0.446		0.0103305		12.4621		0.0675399		0.0392	<	0.005
MA-171120		flanged axe, type Gallemose	Gylling	Aarhus	SAM-11981	VHM 3208	L 12572		2.0761	0.84427	18.615	15.7161	38.6466		LN II	A -A3	11	95.6831		0		0.018		1.411		0.199		0.996227		0.383672		1.31627		0.0042		0
MA-171121		flanged axe, type Hjadstrup	Hjoerring	Hjoerring	SAM-11992	VHM 1945/78	L 12573		1.9833	0.80615	19.512	15.7296	38.6981		LN II	A -A2	3	98.8053		0		0.001		0.013		0.4525		0.731174		0.0155387		0.000925016		0.0021	<	0.005
MA-171122		flanged axe, type Aebelnaes	Tolne Parish	Hjoerring	SAM-11995	VHM 5384	L 12574		2.085	0.84734	18.489	15.6665	38.5496		LN II	A -A6	4	92.3082		0		0.0025		0.064		0.149		0.165151		7.22786		0.0858345		0.0035	<	0.005
MA-171123		flanged axe, type Emmen	Guldagergaard	Hjoerring	SAM-11997	VHM 22391	L 12575		2.0948	0.85348	18.332	15.646	38.4019		LN I-II	A -A1	11	97.2147		0.339	<	0.0135		0.7415		0.286		0.40746		0.357383		0.629732		0.00385	<	0.005
MA-171124		flanged axe, type Vaerslev		Denmark	SAM-12003	ÅHM 1578	L 12576		2.0849	0.84704	18.525	15.6914	38.6228		LN II	A -A4	11	91.7094		0.005		0.0245		1.06		0.8685		0.531441		4.66373		1.06522		0.007		0.00425
MA-171125		flanged axe, type Gallemose		Denmark	SAM-12009	ÅHM 3384	L 0		2.0039	0.81483	19.321	15.7433	38.7174		LN II	A -A3	11	85.8391		0	<	0.0135		0.908		0.3095		0.716953		11.3795		0.801049		0.0091	<	0.005
MA-171126		flanged axe	Hornumbro Moelle	Aalborg	SAM-12010	ÅHM 3210b	L 12578		2.0945	0.85229	18.4	15.6821	38.5388		LN II	A -A11	10	93.959		0		0.0265		2.169		0.6745		1.35259		0.109912		1.59229		0.0553		0.0255
MA-171127		flanged axe, type Vaerslev	Dybvad Moelle (Ars)	Aalborg	SAM-12011	VMÅ139	L 12579		2.0988	0.85667	18.267	15.6488	38.3388		LN II	A -A4	8	91.3379		0		0.0035		0.026		0.102		0.0113093		8.47364		0.00869985		0.04305	<	0.005
MA-171128		flanged axe, type Store-Heddinge	Loevelbro Mark	Viborg	SAM-12018	VSM 6121	L 12580		2.0894	0.85228	18.356	15.6445	38.353		LN II	A -A5	10	91.7894		0		0.0025		0.1155		0.5195		0.771778		6.25473		0.521743		0.01365		0.015725
MA-171129		flanged axe, type Vaerslev		Denmark	SAM-12021	NM 1495	L 12581		2.0898	0.84871	18.472	15.6774	38.6028		LN II	A -A4	10	96.8242		0	<	0.0135		0.7125		0.3905		0.962188		0.299385		0.796478		0.0049		0.012325
MA-171131		flanged axe, type Vaerslev	Sejet	Skanderborg	SAM-12033	FHM 2728	L 12583		2.0864	0.84747	18.513	15.6892	38.6255		LN II	A -A4	10	95.2796		0	<	0.0135		0.4215		0.432		0.612212		2.64868		0.601419	<	0.005		0.008075
MA-171132		flanged axe	Sniderup	Viborg	SAM-12037	FHM 6299	L 12584		2.094	0.8547	18.296	15.6376	38.3118		LN II	A -A11	10	96.1251		0		0.003		0.137		0.746		0.889817		1.42927		0.636397		0.02485		0.031025
MA-180925		spearhead	Bondesgaarde	Horsens		B15117	L 13962		2.0488	0.82845	18.887	15.6469	38.6957		NBA IA	SP	4?	92.2397	<	0	<	0.0095		0.284		0.494		0.026		6.825		0.057		0.04	<	0.001275
MA-180926		spearhead	Bondesgaarde	Horsens		B15110	L 13963		2.0466	0.82724	18.916	15.6481	38.7135		NBA IA	SP	4?	90.1121		0	<	0.0055		0.72		0.36		0.138		4.844		0.3025		3.4876		0.009775
MA-180927		spearhead	Bondesgaarde	Horsens		B15115	L 13964		2.0364	0.82196	19.056	15.6633	38.8056		NBA IA	SP	4?	92.24	<	0.016	<	0.0065		0.2315		0.238		0.006		7.193		0.0195		0.016	<	0
MA-180928		spearhead	Bondesgaarde	Horsens		B15101	L 13965		2.0516	0.82866	18.904	15.665	38.7834		NBA IA	SP	4?	94.3837		0	<	0.0055		0.4035		0.623		0.0165		4.3685		0.1665		0.0168	<	0
MA-180929		spearhead	Bondesgaarde	Horsens		B15131	L 13966		2.0479	0.82782	18.912	15.6557	38.7299		NBA IA	SP	4?	91.6528	<	0.002	<	0.005		0.258		0.433		0.1125		7.2115		0.194		0.0984		0.0068
MA-180930		spearhead	Bondesgaarde	Horsens		B15135	L 13967		2.0502	0.82865	18.891	15.654	38.7303		NBA IA	SP	4?	93.7281		0	<	0.007		0.1235		0.6955		0.0165		5.296		0.049		0.056	<	0.000425
MA-180958		spearhead	Virring	Randers		B3958	L 13982		2.0603	0.83429	18.768	15.658	38.6677		NBA IA	SP	4?	94.0062		0	<	0.0055		0.3955		0.7125		0.247		4.215		0.369		0.0228		0.014025
MA-180959		spearhead, Torsted type	Virring	Randers		B3959	L 13983		2.0703	0.84005	18.632	15.6518	38.5738		NBA IA	SP	4?	91.6392		0		0.0165		0.356		0.401		0.0075		7.3445		0.2045		0.0084	<	0.000425
MA-180960		spearhead, Torsted type	Virring	Randers		B3960	L 13984		2.0634	0.83635	18.708	15.6464	38.6021		NBA IA	SP	4?	97.2472		0	<	0.003		0.3345		0.404		0.159		1.622		0.182		0.0352		0.0051
MA-180961		spearhead, Torsted type	Virring	Randers		B3961	L 13985		2.0587	0.83326	18.793	15.6595	38.6891		NBA IA	SP	4?	92.255		0		0.0095		0.278		0.3435		0.097		6.868		0.112		0.0156	<	0.0034
MA-181025		flanged axe Store Heddinge type	Sevel	Ringkoebing	SAM-8189	B1947	L 13991		2.092	0.85176	18.388	15.6622	38.4677		NBA IA	A -A5	4?	96.6192		0	<	0.003		0.227		0.295		1.016		1.091		0.743		0.0024		0.01445
MA-181035		flanged axe, Anglo-Irish type	Freddinge	Schonen	SAM-3883	ML6573	L 14001		2.082	0.84113	18.673	15.7064	38.8772		LN II	A -A10	8	90.3563	<	0.008	<	0.004		0.072		0.435		0.307		8.522		0.256		0.02		0.00765
MA-181036		flanged axe, Anglo-Irish type	Breddinge	Schonen	SAM-3884	ML6574	L 14002		2.0335	0.81079	19.402	15.7309	39.454		LN II	A -A10	1	89.5836		0	<	0.003		0.037	<	0.01		0.007		10.343		0.005		0.0024	<	0
MA-181037		flanged axe, Anglo-Irish type	Löddeköpinge	Schonen	SAM-3900	ML11056	L 14003		2.0786	0.84554	18.531	15.6687	38.5185		LN II	A -A10	8	93.2226		0	<	0.001		0.039		0.371		0.728		5.169		0.447		0.0048		0.0136

## Sheet: Museum number
	Abbreviation		Museum
	FHM	ÅHM	Forhistorisk Museum Moesgaard, Aarhus
	FSM		Fyns Stiftmuseum/ Odense Bys Museer
	NM	B	Nationalmuseet København, Danmark
	Horsens		Horsens Museum
	Ringk.		Ringkøbing-Skjern Museum
	Thisted		Museum Thy
	Hobro		Naturhistorisk Museum Aalborg/ Hobro Museum
	Maribo		Museum Lolland Falster/ Stiftsmuseum Maribo
	Nt		Næstved Museum
	Hol		Museum Vestsjælland
	Rud.		Langelands Museum, Rudkøbing
	Sven.		Svendborg Museum
	HAD		Museum Sønderjylland Haderslev
	SØM		Odense Bys Museums Samlinger
	AA		Museum Sønderjylland Åbenrå
	VHM		Vedsyssel Historiske Museum
	VMÅ		Vesthimmerlands Museum
	VSM		Viborg Stiftsmuseum
	ML		Museum Lund
